# Supplementary material for: Immunological Properties of Neural Crest Cells Derived from Human Induced Pluripotent Stem Cells
Source: PubMed Central journal article supplement — Stem Cells Dev. 2018 Dec 29;28(1):28–43. doi: 10.1089/scd.2018.0058 (PMC6350061; doi:10.1089/scd.2018.0058), 2018-12-29
Supplement: Supp_Fig2.pdf [file Supp_Fig2.pdf]

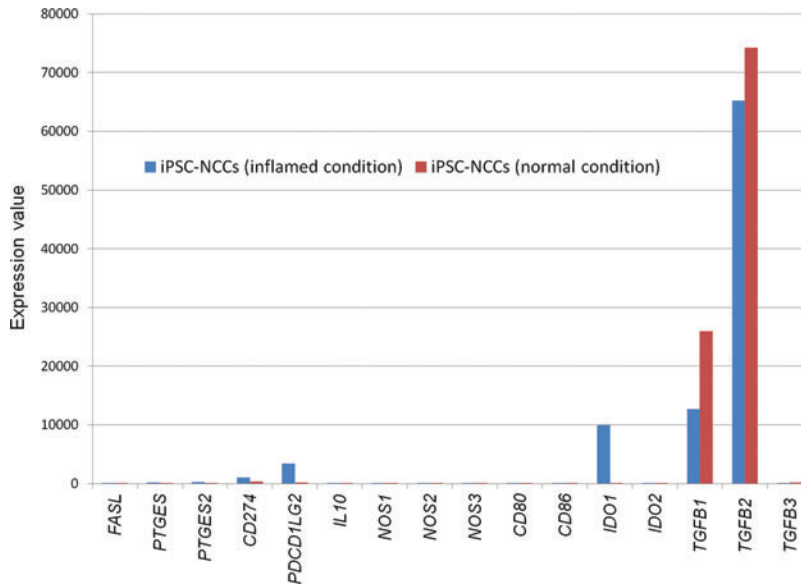

**SUPPLEMENTARY FIG. S2.** Expression of mRNA for immunosuppressive factors in iPSC-NCCs under inflamed conditions as assessed by DNA microarray. Total RNA of iPSC-NCCs (inflamed condition,  $n=2$ , blue bars) and iPSC-NCCs (normal condition,  $n=2$ , red bars) was extracted and analyzed by microarray. Immunosuppressive molecules - *FASLG*; Fas ligand, *PTGES*; prostaglandin E synthase, *PTGES2*; prostaglandin E synthase 2, *PDCD1LG2*; programmed death 1 ligand 2, *IL10*; interleukin 10, *NOS1*; nitric oxide synthase 1, *NOS2*; nitric oxide synthase 2, *NOS3*; nitric oxide synthase 3, *IDO1*; indoleamine 2,3-dioxygenase 1, *IDO2*; indoleamine 2,3-dioxygenase 2, *TGFB1*; transforming growth factor beta 1, *TGFB2*; transforming growth factor beta 2, *TGFB3*; transforming growth factor beta 3.
