# Supplementary material for: Immunological Properties of Neural Crest Cells Derived from Human Induced Pluripotent Stem Cells
Source: PubMed Central journal article supplement — Stem Cells Dev. 2018 Dec 29;28(1):28–43. doi: 10.1089/scd.2018.0058 (PMC6350061; doi:10.1089/scd.2018.0058), 2018-12-29
Supplement: Supp_Fig3.pdf [file Supp_Fig3.pdf]

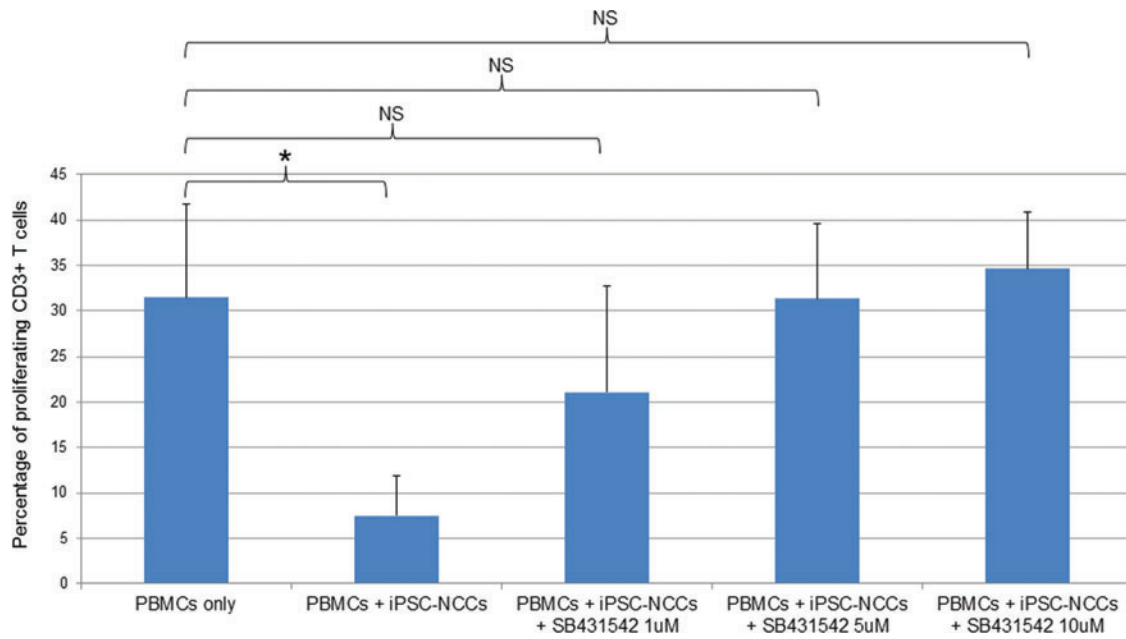

**SUPPLEMENTARY FIG. S3.** Dose-dependent effects of SB431542 to neutralize the T cell suppression of iPSC-NCCs. PBMCs plus anti-human CD3 and anti-human CD28 antibodies were cocultured with iPSC-NCCs in the presence of 1, 5, and 10  $\mu$ M of SB431542. PBMCs only and PBMCs cocultured with iPSC-NCCs in the absence of SB431542 were used as controls. PBMC proliferation was evaluated by CD3-Ki-67 FACS analysis. Percentages of proliferating T cells were examined. Data are the mean  $\pm$ SD of three experiments. \* $P < 0.05$ , compared to the two groups. FACS, fluorescence-activated cell sorting; NS, not significant.
